# Supplementary material
Source: publisher site journal article supplement (https://www.dovepress.com/article/supplementary_file/597540/597540%20Supplementary%20Materials.docx)
Supplement: Supplementary file 1 [file 597540%20Supplementary%20Materials.docx]

**Supplementary material**

**Table S1** Frequency, severity, and duration of URTIs as assessed by the WURSS-24 questionnaire over the 84-day supplementation period for the ITT population (n = 100)

| **Outcome** | **RJ** | **Placebo** | **P-value [95% CI]** |
| --- | --- | --- | --- |
| **Frequency of URTI (*# of incidences*)** | | | |
| Mean ± SD (n) | 1.30 ± 1.33 (46) | 1.41 ± 1.35 (44) | 0.670 |
| Median (Q1 to Q3) | 1.00 (0.00 to 2.00) | 1.00 (0.00 to 2.25) | 1.08* [0.76 to 1.54] |
| (Min to Max) | (0.00 to 5.00) | (0.00 to 5.00) |  |
| **AUC score (*no units*)** | | | |
| Mean ± SD (n) | 83.24 ± 100.66 (46) | 109.03 ± 170.06 (44) | 0.994 |
| Median (Q1 to Q3) | 45.00 (2.25 to 110.00) | 48.75 (0.00 to 148.25) | 0.00** [-27.00 to 20.50] |
| (Min to Max) | (0.00 to 365.00) | (0.00 to 876.00) |  |
| **Duration of URTI (*days*)** | | | |
| Mean ± SD (n) | 4.98 ± 4.19 (31) | 4.89 ± 4.92 (30) | 0.832 |
| Median (Q1 to Q3) | 4.00 (2.00 to 7.00) | 3.00 (2.00 to 7.00) | 0.98* [0.72 to 1.34] |
| (Min to Max) | (1.00 to 19.00) | (1.00 to 22.00) |  |

**Notes:** P-value for URTI frequency was calculated using a Poisson model. P-value for AUC was calculated using a Wilcoxon rank-sum test. P-value for duration days for URTI symptoms was calculated using a negative binomial model. *Estimated rate ratio; **estimated difference. AUC, aera under the curve; CI, confidence interval; min, minimum; max, maximum; n, number of participants; Q1, first quartile; Q3, third quartile; RJ, royal jelly; SD, standard deviation; URTI, upper respiratory tract infection.


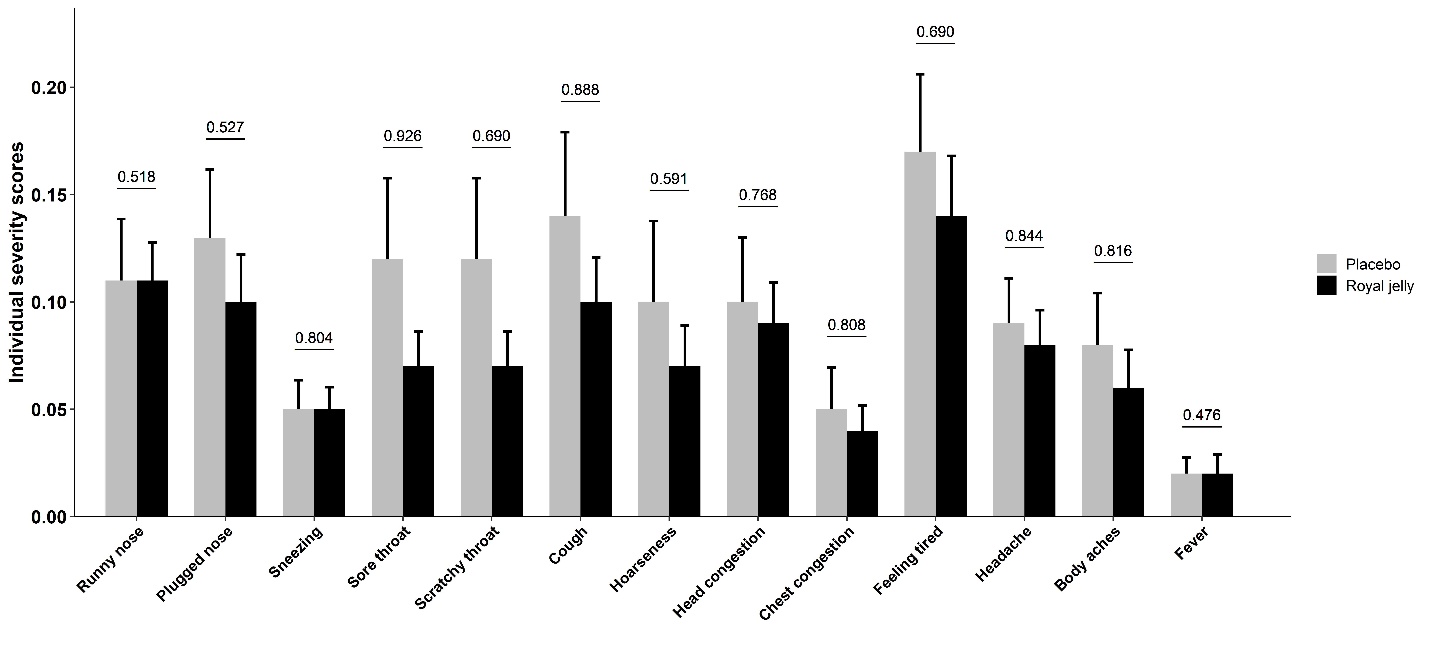


**Figure S1** Individual severity scores of URTI symptoms for the ITT population (n = 100; 50 participants per group), as assessed by the WURSS-24 questionnaire. Data are presented as mean ± standard error
